# Supplementary material for: Development and Relative Validity of a Semiquantitative Food Frequency Questionnaire to Estimate Dietary Intake among a Multi-Ethnic Population in the Malaysian Cohort Project
Source: MDPI journal article supplement (doi:10.3390/nu13041163), 2021-04-01
Supplement: s1 [file s1]

**Supplementary Table S1: Complete food group and list included in the semi-quantitative FFQ.**

|                                                                                                                                                                                                                                                                                                                                                                                                                                                                                                                                                                                                                                                                                                                                                                                                                                                                                                                                                                                                                                                                                                                                                                                                                                                          |                                                                                                                                                                                                                                                                                                                                                                                                                                                                                                                                                                                                                                                                                                                                                                                                                                                                                                                                                                                                                                                                                                                                                                                                                                                                                                                              |                                                                                                                                                                                                                                                                                                                                                                                                                                                                                                                                                                                                                                                                                                                                                                                                                                                                                                                                                                                                                                                                                                                                                                                                                                                                                                                                               |
|----------------------------------------------------------------------------------------------------------------------------------------------------------------------------------------------------------------------------------------------------------------------------------------------------------------------------------------------------------------------------------------------------------------------------------------------------------------------------------------------------------------------------------------------------------------------------------------------------------------------------------------------------------------------------------------------------------------------------------------------------------------------------------------------------------------------------------------------------------------------------------------------------------------------------------------------------------------------------------------------------------------------------------------------------------------------------------------------------------------------------------------------------------------------------------------------------------------------------------------------------------|------------------------------------------------------------------------------------------------------------------------------------------------------------------------------------------------------------------------------------------------------------------------------------------------------------------------------------------------------------------------------------------------------------------------------------------------------------------------------------------------------------------------------------------------------------------------------------------------------------------------------------------------------------------------------------------------------------------------------------------------------------------------------------------------------------------------------------------------------------------------------------------------------------------------------------------------------------------------------------------------------------------------------------------------------------------------------------------------------------------------------------------------------------------------------------------------------------------------------------------------------------------------------------------------------------------------------|-----------------------------------------------------------------------------------------------------------------------------------------------------------------------------------------------------------------------------------------------------------------------------------------------------------------------------------------------------------------------------------------------------------------------------------------------------------------------------------------------------------------------------------------------------------------------------------------------------------------------------------------------------------------------------------------------------------------------------------------------------------------------------------------------------------------------------------------------------------------------------------------------------------------------------------------------------------------------------------------------------------------------------------------------------------------------------------------------------------------------------------------------------------------------------------------------------------------------------------------------------------------------------------------------------------------------------------------------|
| <b>A. Cereals &amp; cereals products</b><br>1. White rice<br>2. Basmati rice<br>3. Brown rice<br>4. Fried rice<br>5. Rice/ 'Nasi Dagang'<br>6. Rice/ 'Nasi Arab'/ 'Nasi Briyani'/ 'Nasi Jagung'/ 'Nasi Minyak'/ 'Nasi Tomato'<br>7. Rice cooked with coconut milk/ 'Nasi Lemak'<br>8. Chicken Rice<br>9. Rice/ 'Nasi Kerabu'<br>10. Plain Porridge<br>11. Porridge (e.g.: chicken porridge/ fish porridge/ meat porridge/ <i>lambuk</i> porridge)<br>12. Fried Noodles ('mee/ mee-hoon/ kueh-teow/ wantan mee')<br>13. Noodles cooked with gravy (e.g.: 'hailam/ kicap/ kolok/ sizzling')<br>14. Noodles cooked with coconut milk gravy (e.g.: 'bandung/ kari/ rebus')<br>15. Noodles with soup (e.g.: 'mee/ mee-hoon/ kueh-teow/ wantan mee soup')<br>16. Penang Noodle 'Laksa'<br>17. Noodle 'Laksa/laksam' with coconut milk gravy<br>18. 'Roti Canai'<br>19. Chapatti<br>20. 'Tosai'<br>21. Breakfast cereals<br>22. Oats<br>23. White bread<br>24. Wholemeal bread<br>25. Whole grain bread<br>26. Sweet bun<br>27. Sandwich<br>28. Plain Crackers<br>29. Wholemeal cracker<br>30. Sweet biscuits (e.g.: sugar/ Marie/ chocolate)<br>31. Biscuits with cream (e.g.: chocolate cream/ peanut butter cream/ cheese cream)<br>32. Fried dimsum/ wantan | <b>D. Eggs</b><br>74. Boiled egg<br>75. Fried egg<br>76. Salted egg<br><br><b>E. Vegetables</b><br>77. Fried green leafy vegetables<br>78. Green leafy vegetables soup<br>79. Green leafy vegetables cooked with coconut milk gravy (e.g.: curry/ 'lemak')<br>80. Green leafy vegetables cooked by steamed/ boiled<br>81. Fried cruciferous vegetables<br>82. Cruciferous vegetables soup<br>83. Cruciferous vegetables cooked with coconut milk gravy (e.g.: curry/ 'lemak')<br>84. Cruciferous vegetables cooked by steamed/ boiled<br>85. Fried bean vegetables<br>86. Bean vegetables soup<br>87. Bean vegetables cooked with coconut milk gravy (e.g.: curry/ 'lemak')<br>88. Bean vegetables cooked by steamed/ boiled<br>89. Fried starchy vegetables<br>90. Starchy vegetables soup<br>91. Starchy vegetables cooked with coconut milk gravy (e.g.: curry/ 'lemak')<br>92. Starchy vegetables cooked by steamed/ boiled<br>93. Fried fruit vegetables<br>94. Fruit vegetables soup<br>95. Fruit vegetables cooked with coconut milk gravy eg: curry/ 'lemak')<br>96. Fruit vegetables cooked by steamed/ boiled<br>97. 'Ulam' (e.g.: cucumber/ tomato/ salad/ 'petai')<br><br><b>F. Starchy Roots Tubers &amp; Products</b><br>98. Fried Potato<br>99. Potato cooked with coconut milk (e.g.: curry/ 'kurma/ lemak') | <b>L. Traditional Malaysian 'Kuih' &amp; Confectionaries</b><br>144. Fried & spicy traditional kuih (e.g.: curry puff/ samosa/ popia rolls/ vadai)<br>145. Fried & sweet traditional kuih (e.g.: doughnut / 'ham chi peng/ laddoo/ cakoi')<br>146. Grilled/ Steamed spicy traditional kuih (e.g.: grilled glutinous rice/ 'cara berlauk/ meat pau')<br>147. Grilled/ Steamed sweet traditional kuih (e.g.: apam/ kuih angkoo/ kaya pau/ kuih talam)<br>148. Sweet porridge (e.g.: durians porridge/ green beans porridge/ sweet potato porridge)<br>149. Cakes<br>150. Pastry (e.g.: pie/ croissant)<br>151. Jelly/ 'agar-agar'<br>152. 'Ais kacang/ Cendol'<br>153. Ice cream<br>154. Chocolate<br>155. Sweets<br>156. 'Kerepek/ keropok/ muruku'<br><br><b>M. Fastfood</b><br>157. Fried chicken with flour (e.g.: chicken chop)<br>158. Burger/ hotdog<br>159. Special Burger (e.g.: burger 'bakar'/ extra cheese/ extra egg)<br>160. Pizza<br>161. Spaghetti Bolognese<br>162. Spaghetti Carbonara<br>163. Sausage/ Frankfurter<br>164. Nugget<br>165. French fries<br>166. Wedges<br>167. Mashed potato<br>168. Coleslaw<br>169. Creamy mushroom soup<br><br><b>N. Drink &amp; Beverages</b><br>170. Plain water<br>171. Tea 'O' (with sugar)<br>172. Tea 'Tarik' (with milk)<br>173. 3 in 1 instant tea<br>174. Coffee 'O' (with sugar) |
|----------------------------------------------------------------------------------------------------------------------------------------------------------------------------------------------------------------------------------------------------------------------------------------------------------------------------------------------------------------------------------------------------------------------------------------------------------------------------------------------------------------------------------------------------------------------------------------------------------------------------------------------------------------------------------------------------------------------------------------------------------------------------------------------------------------------------------------------------------------------------------------------------------------------------------------------------------------------------------------------------------------------------------------------------------------------------------------------------------------------------------------------------------------------------------------------------------------------------------------------------------|------------------------------------------------------------------------------------------------------------------------------------------------------------------------------------------------------------------------------------------------------------------------------------------------------------------------------------------------------------------------------------------------------------------------------------------------------------------------------------------------------------------------------------------------------------------------------------------------------------------------------------------------------------------------------------------------------------------------------------------------------------------------------------------------------------------------------------------------------------------------------------------------------------------------------------------------------------------------------------------------------------------------------------------------------------------------------------------------------------------------------------------------------------------------------------------------------------------------------------------------------------------------------------------------------------------------------|-----------------------------------------------------------------------------------------------------------------------------------------------------------------------------------------------------------------------------------------------------------------------------------------------------------------------------------------------------------------------------------------------------------------------------------------------------------------------------------------------------------------------------------------------------------------------------------------------------------------------------------------------------------------------------------------------------------------------------------------------------------------------------------------------------------------------------------------------------------------------------------------------------------------------------------------------------------------------------------------------------------------------------------------------------------------------------------------------------------------------------------------------------------------------------------------------------------------------------------------------------------------------------------------------------------------------------------------------|

|                                                                                                                                                                                                                                                                                                                                                                                                                                                                                                                                                                                                                                                                                                                                                                                                                                                                                                                                                                                                                                                                                                                                                                                                                                                                                                                                                                                                                                                                                                                                                                        |                                                                                                                                                                                                                                                                                                                                                                                                                                                                                                                                                                                                                                                                                                                                                                                                                                                                                                                                                                                                                                                                                                                                                                                                                                                                                            |                                                                                                                                                                                                                                                                                                                                                                                                                                                                                                                                                                                                                                                                                                                                                                                                                                                                                                                                                                                                                                                                                                                                                         |
|------------------------------------------------------------------------------------------------------------------------------------------------------------------------------------------------------------------------------------------------------------------------------------------------------------------------------------------------------------------------------------------------------------------------------------------------------------------------------------------------------------------------------------------------------------------------------------------------------------------------------------------------------------------------------------------------------------------------------------------------------------------------------------------------------------------------------------------------------------------------------------------------------------------------------------------------------------------------------------------------------------------------------------------------------------------------------------------------------------------------------------------------------------------------------------------------------------------------------------------------------------------------------------------------------------------------------------------------------------------------------------------------------------------------------------------------------------------------------------------------------------------------------------------------------------------------|--------------------------------------------------------------------------------------------------------------------------------------------------------------------------------------------------------------------------------------------------------------------------------------------------------------------------------------------------------------------------------------------------------------------------------------------------------------------------------------------------------------------------------------------------------------------------------------------------------------------------------------------------------------------------------------------------------------------------------------------------------------------------------------------------------------------------------------------------------------------------------------------------------------------------------------------------------------------------------------------------------------------------------------------------------------------------------------------------------------------------------------------------------------------------------------------------------------------------------------------------------------------------------------------|---------------------------------------------------------------------------------------------------------------------------------------------------------------------------------------------------------------------------------------------------------------------------------------------------------------------------------------------------------------------------------------------------------------------------------------------------------------------------------------------------------------------------------------------------------------------------------------------------------------------------------------------------------------------------------------------------------------------------------------------------------------------------------------------------------------------------------------------------------------------------------------------------------------------------------------------------------------------------------------------------------------------------------------------------------------------------------------------------------------------------------------------------------|
| <p>33. Dimsum/ wantan cooked by steamed/ boiled</p> <p><b>B. Meat &amp; Meat product</b></p> <p>34. Fried chicken</p> <p>35. Chicken cooked with coconut milk (e.g.: curry/ 'kurma/ lemak/ percik/ rendang')</p> <p>36. Chicken cooked without coconut milk (e.g.: with chilli/ cooked in soy sauce/ with tomato)</p> <p>37. Chicken cooked in soup/ 'asam pedas/ tomyam'</p> <p>38. Roasted/Grilled Chicken</p> <p>39. Chicken satay</p> <p>40. Fried Meat</p> <p>41. Meat cooked with coconut milk (e.g.: curry/ 'kurma/ lemak/ rendang')</p> <p>42. Meat cooked without coconut milk (e.g.: with chilli/ cooked in soy sauce/ with tomato)</p> <p>43. Meat cooked in soup/ 'asam pedas/ tomyam'</p> <p>44. Roasted/Grilled Meat</p> <p>45. Meat Satay</p> <p>46. Fried internal organ</p> <p>47. Internal organ cooked with coconut milk (e.g.: curry/ 'kurma/ lemak/ percik/ rendang')</p> <p>48. Internal organ cooked without coconut milk (e.g.: with chilli/ cooked in soy sauce/ with tomato)</p> <p>49. Internal organ satay</p> <p>50. Fried pork</p> <p>51. Pork cooked without coconut milk (e.g.: with chilli/ cooked in soy sauce/ with tomato)</p> <p>52. Pork cooked in soup/ 'asam pedas/ tomyam'</p> <p>53. Roasted/ grilled pork</p> <p><b>C. Fish &amp; Fish product</b></p> <p>54. Fried fish</p> <p>55. Fish cooked with coconut milk (e.g.: curry/ 'kurma/ lemak/ percik/ rendang')</p> <p>56. Fish cooked without coconut milk (e.g.: with chilli/ cooked in soy sauce/ with tomato)</p> <p>57. Fish cooked in soup/ 'asam pedas/ tomyam'</p> | <p>100. Potato cooked without coconut milk (e.g.: with chilli/ cooked in soy sauce)</p> <p>101. Potato cooked by steamed/ boiled</p> <p><b>G. Soys &amp; soy product</b></p> <p>102. Fried soy product</p> <p>103. Soy product cooked with coconut oil (e.g.: curry/ 'lemak')</p> <p>104. Soy product cooked without coconut oil milk (e.g.: with chilli/ cooked in soy sauce)</p> <p>105. Soy product cooked by steamed/ boiled</p> <p>106. Soy product grilled</p> <p><b>H. Nuts</b></p> <p>107. Fried nuts</p> <p>108. Nuts cooked by steamed/ boiled</p> <p>109. Nuts gravy</p> <p>110. Sambhar</p> <p><b>I. Seasonings &amp; Condiments</b></p> <p>111. Salted / Sweet soy sauces/ 'sambal kicap'</p> <p>112. Chilli / Tomato sauces</p> <p>113. 'Sambal belacan'/ 'budu'/ 'cencalok'</p> <p>114. Stir fry sauces ('sambal tumis')</p> <p>115. Rasam</p> <p>116. Chutney</p> <p><b>J. Spread</b></p> <p>117. Margarine</p> <p>118. Butter</p> <p>119. Fruits jam</p> <p>120. Kaya jam</p> <p>121. Peanut butter</p> <p>122. Chocolate spread</p> <p>123. Mayonise/ salad dressing</p> <p><b>K. Fruits</b></p> <p>124. Grapes</p> <p>125. Papaya</p> <p>126. Pears</p> <p>127. Dragon fruit</p> <p>128. Jackfruit</p> <p>129. Green/ red apples</p> <p>130. Guava</p> <p>131. Kiwi</p> | <p>175. Coffee with milk</p> <p>176. 3 in 1 instant coffee</p> <p>177. Malted drink/ chocolate malted drink 'O' (with sugar)</p> <p>178. Malted drink/ chocolate malted drink with milk</p> <p>179. 3 in 1 instant malted drink</p> <p>180. Chinese tea</p> <p>181. Green tea</p> <p>182. Cordial drink</p> <p>183. Carbonated drink/ isotonic drink</p> <p>184. Energy drink</p> <p>185. Soy drink</p> <p>186. Fresh fruits juice (e.g.: apple/ mango/ orange)</p> <p>187. Commercial fruits juice (e.g.: apple/ mango/ orange)</p> <p><b>O. Food additives</b></p> <p>188. Condensed milk</p> <p>189. White sugar</p> <p>190. Honey</p> <p>191. Artificial sweetener</p> <p><b>P. Milk &amp; milk products</b></p> <p>192. Fresh milk</p> <p>193. Skimmed milk powder</p> <p>194. Low fat milk powder</p> <p>195. Full cream milk powder</p> <p>196. Low fat UHT Milk</p> <p>197. Full cream UHT Milk</p> <p>198. Yogurt unflavoured</p> <p>199. Yogurt with flavours</p> <p>200. Cheese</p> <p><b>Q. Alcoholic beverages</b></p> <p>201. Beer/ ale</p> <p>202. Wine/ champagne/ brandy</p> <p>203. Whiskey/ vodka/ 'samsu/ toddy/ tuak/ langkau'</p> |
|------------------------------------------------------------------------------------------------------------------------------------------------------------------------------------------------------------------------------------------------------------------------------------------------------------------------------------------------------------------------------------------------------------------------------------------------------------------------------------------------------------------------------------------------------------------------------------------------------------------------------------------------------------------------------------------------------------------------------------------------------------------------------------------------------------------------------------------------------------------------------------------------------------------------------------------------------------------------------------------------------------------------------------------------------------------------------------------------------------------------------------------------------------------------------------------------------------------------------------------------------------------------------------------------------------------------------------------------------------------------------------------------------------------------------------------------------------------------------------------------------------------------------------------------------------------------|--------------------------------------------------------------------------------------------------------------------------------------------------------------------------------------------------------------------------------------------------------------------------------------------------------------------------------------------------------------------------------------------------------------------------------------------------------------------------------------------------------------------------------------------------------------------------------------------------------------------------------------------------------------------------------------------------------------------------------------------------------------------------------------------------------------------------------------------------------------------------------------------------------------------------------------------------------------------------------------------------------------------------------------------------------------------------------------------------------------------------------------------------------------------------------------------------------------------------------------------------------------------------------------------|---------------------------------------------------------------------------------------------------------------------------------------------------------------------------------------------------------------------------------------------------------------------------------------------------------------------------------------------------------------------------------------------------------------------------------------------------------------------------------------------------------------------------------------------------------------------------------------------------------------------------------------------------------------------------------------------------------------------------------------------------------------------------------------------------------------------------------------------------------------------------------------------------------------------------------------------------------------------------------------------------------------------------------------------------------------------------------------------------------------------------------------------------------|

|                                                                                                                                                                                                                                                                                                                                                                                                                                                                                                                                                                                                                                                                                                                                            |                                                                                                                                                                                                                                                                                                       |  |
|--------------------------------------------------------------------------------------------------------------------------------------------------------------------------------------------------------------------------------------------------------------------------------------------------------------------------------------------------------------------------------------------------------------------------------------------------------------------------------------------------------------------------------------------------------------------------------------------------------------------------------------------------------------------------------------------------------------------------------------------|-------------------------------------------------------------------------------------------------------------------------------------------------------------------------------------------------------------------------------------------------------------------------------------------------------|--|
| 58. Roasted/grilled fish<br>59. Fried anchovies/ with chilli<br>60. Canned fish with chilli (e.g.: sardines/tuna)<br>61. Fried salted fish<br>62. Fish ball/ fishcakes<br>63. Fried seafood<br>64. Seafood cooked with coconut milk (e.g.: curry/ 'kurma/ lemak')<br>65. Seafood cooked without coconut milk (e.g.: with chilli/ cooked in soy sauce/ with tomato)<br>66. Seafood cooked in soup/ 'asam pedas/ tomyam'<br>67. Roasted/grilled seafood<br>68. Shellfish cooked with coconut milk (e.g.: 'lemak/ rendang')<br>69. Shellfish cooked with chilli<br>70. Shellfish cooked by steamed/ boiled<br>71. Crab cooked with coconut milk (e.g.: 'lemak/ rendang')<br>72. Crab cooked with chilli<br>73. Crab cooked by steamed/ boiled | 132. Tangerines / oranges<br>133. Mango<br>134. Pineapples<br>135. Banana<br>136. Watermelon<br>137. Honeydew/ rock melon<br>138. <i>Plum</i><br>139. Fruit cooked with coconut oil (e.g.: curry/ 'lemak')<br>140. Fruit 'acar' / Fruit 'kerabu'<br>141. Lychee/ Longan<br>142. Dates<br>143. Raisins |  |
|--------------------------------------------------------------------------------------------------------------------------------------------------------------------------------------------------------------------------------------------------------------------------------------------------------------------------------------------------------------------------------------------------------------------------------------------------------------------------------------------------------------------------------------------------------------------------------------------------------------------------------------------------------------------------------------------------------------------------------------------|-------------------------------------------------------------------------------------------------------------------------------------------------------------------------------------------------------------------------------------------------------------------------------------------------------|--|

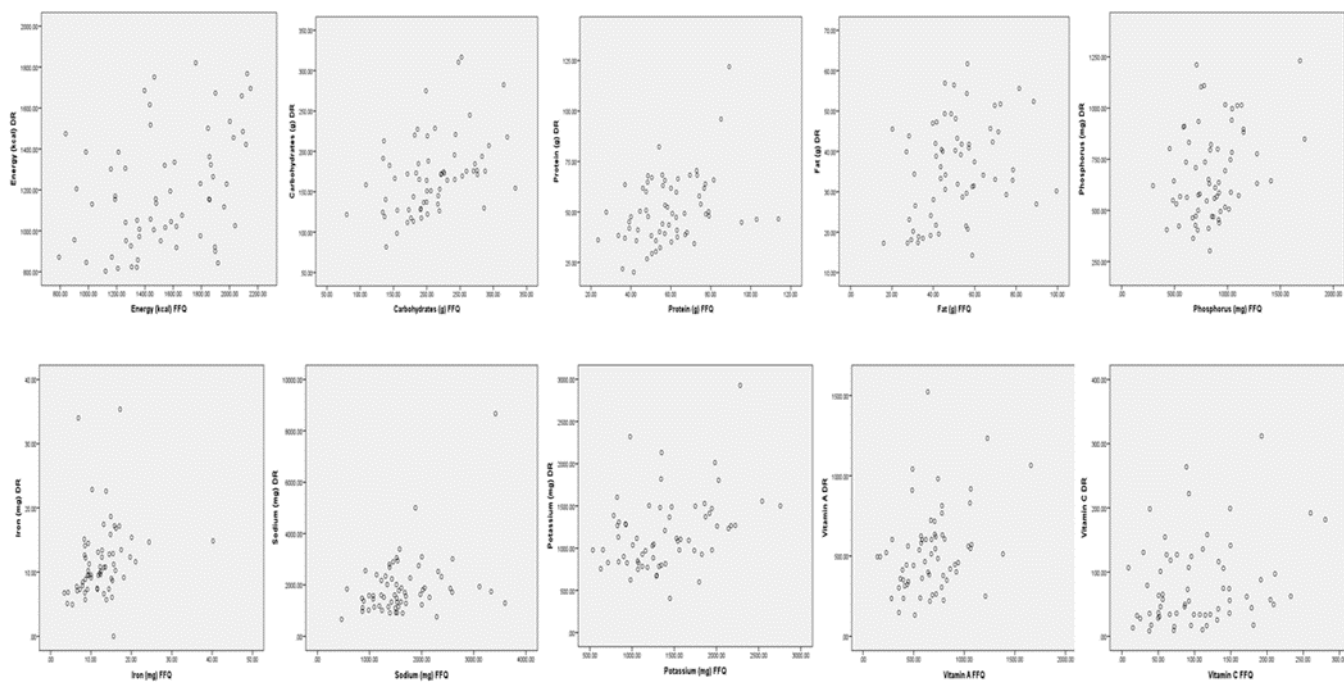

**Supplementary Figure S1:** Comparison of nutrient intakes between FFQ and 3DR
